# Supplementary material
Source: Elsevier journal article supplement (https://www.sciencedirect.com/science/article/pii/S0001731019301218)
Supplement: mmc1 [file S0001731019301218:mmc1.pdf]

Tabla suplementaria 1: estrategia de búsqueda en bases de datos nacionales e internacionales\*

|          | Pubmed/Medline                                                                                                                                                                                                                                                                                                                                                                                                                                                                                                  | Medes                                                                                                                                                                                                                                                                                                                                                        | Ibecs                                                                                                                                                                                                                                                                               |
|----------|-----------------------------------------------------------------------------------------------------------------------------------------------------------------------------------------------------------------------------------------------------------------------------------------------------------------------------------------------------------------------------------------------------------------------------------------------------------------------------------------------------------------|--------------------------------------------------------------------------------------------------------------------------------------------------------------------------------------------------------------------------------------------------------------------------------------------------------------------------------------------------------------|-------------------------------------------------------------------------------------------------------------------------------------------------------------------------------------------------------------------------------------------------------------------------------------|
| #1       | "Psoriasis"[Mesh]                                                                                                                                                                                                                                                                                                                                                                                                                                                                                               | "Psoriasis"[todos]                                                                                                                                                                                                                                                                                                                                           | "Psoriasis"[Palabras]                                                                                                                                                                                                                                                               |
| #2       | "Arthritis, Psoriatic"[Mesh]                                                                                                                                                                                                                                                                                                                                                                                                                                                                                    | "artritis psoriasica"[todos]                                                                                                                                                                                                                                                                                                                                 |                                                                                                                                                                                                                                                                                     |
| #3       | ("quality of life"[Mesh] OR "quality of life" OR "QoL" OR "health-related quality of life" OR "HRQoL" OR "adherence" OR "medication adherence"[Mesh] OR "compliance" OR "treatment compliance" OR "patient compliance"[Mesh] OR "satisfaction" OR "treatment satisfaction" OR "patient satisfaction"[Mesh] OR "preferences" OR "patient preferences"[Mesh] OR "cumulative life course impairment")                                                                                                              | ("calidad de vida"[todos] OR "CVRS"[todos] OR "calidad de vida relacionada con la salud"[todos] OR "adherencia"[todos] OR "cumplimiento"[todos] OR "satisfacción"[todos] OR "preferencias"[todos] OR "discapacidad acumulada en el transcurso vital"[todos])                                                                                                 | ("calidad" OR "calidad de vida" OR "CVRS" OR "calidad de vida relacionada con la salud" OR "adherencia" OR "cumplimiento" OR "satisfacción" OR "preferencias" OR "discapacidad acumulada en el transcurso vital" OR "CLCI") [Palabras])                                             |
| #4       | "Spain"                                                                                                                                                                                                                                                                                                                                                                                                                                                                                                         |                                                                                                                                                                                                                                                                                                                                                              |                                                                                                                                                                                                                                                                                     |
| Búsqueda | <b>(#1 NOT #2) AND #3 AND #4</b><br>(("Psoriasis"[Mesh]) NOT ("Arthritis, Psoriatic"[Mesh])) AND ("quality of life"[Mesh] OR "quality of life" OR "qol" OR "health-related quality of life" OR "hrqol" OR "adherence" OR "medication adherence"[Mesh] OR "compliance" OR "treatment compliance" OR "patient compliance"[Mesh] OR "satisfaction" OR "treatment satisfaction" OR "patient satisfaction"[Mesh] OR "preferences" OR "patient preferences"[Mesh] OR "cumulative life course impairment") AND "Spain" | <b>(#1 NOT #2) AND #3 AND #4</b><br>(("psoriasis"[todos]) NOT "artritis psoriasica"[todos]) AND ("calidad de vida"[todos] OR "CVRS"[todos] OR "calidad de vida relacionada con la salud"[todos] OR "adherencia"[todos] OR "cumplimiento"[todos] OR "satisfacción"[todos] OR "preferencias"[todos] OR "discapacidad acumulada en el transcurso vital"[todos]) | <b>#1 AND #3</b><br>psoriasis [Palabras] and ("calidad" OR "calidad de vida" OR "CVRS" OR "calidad de vida relacionada con la salud" OR "adherencia" OR "cumplimiento" OR "satisfacción" OR "preferencias" OR "discapacidad acumulada en el transcurso vital" OR "CLCI") [Palabras] |

\* Búsqueda desarrollada según recomendaciones del Manual Cochrane de Revisiones Sistemáticas de Intervenciones

(Centro Cochrane Iberoamericano, traductores. Manual Cochrane de Revisiones Sistemáticas de Intervenciones, versión 5.1.0 [marzo 2011] [Internet]. Barcelona: Centro Cochrane Iberoamericano; 2012. Disponible en <http://www.cochrane.es/?q=es/node/269>).

Tabla suplementaria 2: definición de las propiedades psicométricas y valores de referencia

| Propiedad                    | Definición principal                                                                                                                     | Ítems y definición                                                                                                                                                                                                  | Medidas y valores de referencia                                                                                                                                                                                                                                                                                                                                                                                                                                                              |
|------------------------------|------------------------------------------------------------------------------------------------------------------------------------------|---------------------------------------------------------------------------------------------------------------------------------------------------------------------------------------------------------------------|----------------------------------------------------------------------------------------------------------------------------------------------------------------------------------------------------------------------------------------------------------------------------------------------------------------------------------------------------------------------------------------------------------------------------------------------------------------------------------------------|
| Modelo conceptual y medición | Justificación y la descripción del concepto y las poblaciones que el instrumento pretende evaluar y la relación entre estos conceptos.   | <b>Concepto</b> a medir: el concepto a medir está claramente establecido.                                                                                                                                           | <ul style="list-style-type: none"> <li>- El concepto amplio que el instrumento pretende medir (por ejemplo, estado funcional, CVRS, satisfacción, etc.) está claramente establecido;</li> <li>- Si el instrumento está diseñado para evaluar dominios múltiples, se proporciona una lista de todos los dominios o dimensiones.</li> </ul>                                                                                                                                                    |
|                              |                                                                                                                                          | Obtención y combinación de <b>ítems</b> : la base conceptual y empírica para obtener los elementos para el instrumento y para combinarlos en una o más dimensiones está claramente establecida y es apropiada.      | <ul style="list-style-type: none"> <li>- Descripción de la base conceptual y métodos para generar ítems (por ejemplo, revisión de la literatura, opinión de expertos, otros cuestionarios, etc.);</li> <li>- La justificación para combinar diferentes ítems en una o más dimensiones (p. ej., mediante análisis factorial, opinión de expertos) se establece claramente;</li> <li>- La justificación para incluir un ítem en una dimensión y no en otra se establece claramente.</li> </ul> |
|                              |                                                                                                                                          | <b>Implicación de pacientes</b> : la participación de la población objetivo para obtener el contenido final del instrumento se describe claramente, los métodos son apropiados y los resultados son satisfactorios. | <ul style="list-style-type: none"> <li>- La población objetivo está involucrada en el proceso de obtención del conjunto de ítems (por ejemplo, a través de grupos focales);</li> <li>- Se ha evaluado la idoneidad del contenido del instrumento para la población diana (p. ej., mediante pruebas previas en poblaciones diana, evaluando el impacto clínico).</li> </ul>                                                                                                                   |
| Adaptación transcultural     | Traslación del instrumento desde el contexto cultural original mediante un proceso que asegure su equivalencia lingüística y conceptual. | <b>Equivalencia lingüística</b> : Los métodos aplicados para lograr y evaluar la equivalencia lingüística con el original están adecuadamente descritos y son apropiados.                                           | <ul style="list-style-type: none"> <li>- Realización de al menos dos traducciones directas independientes del idioma de origen;</li> <li>- Una retro-traducción al idioma de origen;</li> <li>- Versiones revisadas por paneles de expertos y pacientes;</li> <li>- Pruebas de campo sobre la aceptabilidad y comprensibilidad del instrumento.</li> </ul>                                                                                                                                   |
|                              |                                                                                                                                          | <b>Equivalencia conceptual</b> : Los métodos aplicados para lograr y evaluar la equivalencia conceptual de los ítems están adecuadamente descritos y son apropiados.                                                | <ul style="list-style-type: none"> <li>- Evaluación de la validez del contenido (equivalencia en relevancia y significado de los mismos conceptos medidos) en cada grupo cultural o lingüístico en los que se va a aplicar el instrumento, mediante paneles de expertos y pacientes;</li> </ul>                                                                                                                                                                                              |

|            |                                                                                                                                                                                                                                                                                                                                                                       |                                                                                                                                                                                                                                                                                                                                                  |                                                                                                                                                                                                                                                                                                                                                                                                                                                                                      |
|------------|-----------------------------------------------------------------------------------------------------------------------------------------------------------------------------------------------------------------------------------------------------------------------------------------------------------------------------------------------------------------------|--------------------------------------------------------------------------------------------------------------------------------------------------------------------------------------------------------------------------------------------------------------------------------------------------------------------------------------------------|--------------------------------------------------------------------------------------------------------------------------------------------------------------------------------------------------------------------------------------------------------------------------------------------------------------------------------------------------------------------------------------------------------------------------------------------------------------------------------------|
|            |                                                                                                                                                                                                                                                                                                                                                                       |                                                                                                                                                                                                                                                                                                                                                  | - Evaluación del posible funcionamiento diferencial de los ítem en la versión adaptada del instrumento (por ejemplo, mediante un análisis factorial confirmatorio).                                                                                                                                                                                                                                                                                                                  |
|            |                                                                                                                                                                                                                                                                                                                                                                       | Identificación y resolución de las diferencias significativas entre las versiones original y adaptada.                                                                                                                                                                                                                                           | - Identificación de diferencias significativas entre las versiones original y adaptada, explicación y resolución de inconsistencias.                                                                                                                                                                                                                                                                                                                                                 |
| Fiabilidad | Grado de consistencia con que los ítems del instrumento miden el atributo propuesto libre de error de medición, y grado en que el instrumento permite una reproducción y resultados consistentes cuando se aplica en momentos diferentes, excepto por errores aleatorios. Si no hay errores en la medición o si están minimizados, la medición se considerará fiable. | <b>Consistencia interna:</b> evalúa la relación entre todos los ítems (de una escala) y su capacidad para medir un solo dominio subyacente.                                                                                                                                                                                                      | $\alpha$ de Cronbach (rango 0-1).<br>• Valor aceptable: $>0,7^a$                                                                                                                                                                                                                                                                                                                                                                                                                     |
|            |                                                                                                                                                                                                                                                                                                                                                                       | <b>Reproducibilidad:</b> estabilidad de las puntuaciones de un instrumento en el tiempo cuando no se esperan cambios en el concepto de interés ( <i>test-retest</i> ) y la concordancia entre observadores en un punto en el tiempo.                                                                                                             | Coefficiente de correlación intraclase (CCI).<br>• Valor aceptable: $>0,7^b$                                                                                                                                                                                                                                                                                                                                                                                                         |
| Validez    | El grado en que el instrumento mide el concepto de interés.                                                                                                                                                                                                                                                                                                           | <b>Validez del contenido:</b> evidencia de que los ítems y dominios de un instrumento son apropiados e integrales en relación con el concepto de medición previsto, población y uso.                                                                                                                                                             | - Se presenta evidencia suficiente sobre la validez relacionada con el contenido del instrumento para su uso previsto (claridad, exhaustividad, relevancia y redundancia de los ítems y escalas, evaluación de por un panel de expertos y/o población diana).<br>- Los métodos empleados para evaluar la validez están claramente descritos y son apropiados.<br>- La composición de la muestra utilizada para evaluar la validez se describe con suficiente detalle y es apropiada. |
|            |                                                                                                                                                                                                                                                                                                                                                                       | <b>Validez de constructo:</b> Evidencia de que las relaciones entre elementos, dominios y conceptos se ajustan a hipótesis a priori sobre relaciones lógicas que deberían existir con otras medidas o características de grupos de pacientes similares o diferentes.<br>- Análisis factorial: Medida de adecuación de los ítems del cuestionario | Constructo:<br>a) Coeficiente de correlación (Pearson/Spearman) <sup>c</sup><br>• Débil: 0,10-0,29<br>• Moderado: 0,30-0,49<br>• Fuerte: $\geq 0,5$<br>b) Diferencias significativas ( $p < 0,05$ ) en las puntuaciones entre grupos                                                                                                                                                                                                                                                 |

|                            |                                                                                                                                                                                      |                                                                                                                                                                                                                                                                                                                                                                                                                                                                                                                                                                                                                                                                                                                                                         |                                                                                                                                                                                                        |
|----------------------------|--------------------------------------------------------------------------------------------------------------------------------------------------------------------------------------|---------------------------------------------------------------------------------------------------------------------------------------------------------------------------------------------------------------------------------------------------------------------------------------------------------------------------------------------------------------------------------------------------------------------------------------------------------------------------------------------------------------------------------------------------------------------------------------------------------------------------------------------------------------------------------------------------------------------------------------------------------|--------------------------------------------------------------------------------------------------------------------------------------------------------------------------------------------------------|
|                            |                                                                                                                                                                                      | <p>- Método de grupos conocidos/extremos: Grado en que el instrumento puede distinguir entre grupos a priori diferentes</p> <p><b>Validez de criterio:</b> relación entre la puntuación del instrumento y algún criterio externo. Este criterio debe ser una medida ampliamente aceptada, con las mismas características de la herramienta de evaluación, es decir, un instrumento o criterio considerado como "patrón oro".</p> <p>- <b>Validez convergente:</b> Fuerza de las pruebas de correlación que valoran hipótesis establecidas a priori.</p> <p>- <b>Validez longitudinal:</b> correlación Pearson entre los cambios observados en la puntuación de un cuestionario y las medidas clínicas en el tiempo, respecto a la puntuación basal.</p> | <p>Criterio: Coeficiente de correlación (Pearson/Spearman)<sup>c</sup></p> <ul style="list-style-type: none"> <li>• Débil: 0,10-0,29</li> <li>• Moderado: 0,30-0,49</li> <li>• Fuerte: ≥0,5</li> </ul> |
| Factibilidad               |                                                                                                                                                                                      | <p><b>Viabilidad</b></p> <p>a. Efecto techo y suelo: Porcentaje de pacientes con puntuación máxima y mínima, respectivamente, en cada ítem o dimensión.</p> <p>b. % de no respuesta</p> <p><b>Simplicidad</b></p> <p>a. Modo de administración</p> <p>b. Tiempo de cumplimentación</p>                                                                                                                                                                                                                                                                                                                                                                                                                                                                  | Efecto techo/suelo: valor aceptable <20% <sup>d</sup>                                                                                                                                                  |
| Sensibilidad a los cambios | Evidencia de que un instrumento PRO puede identificar diferencias en las puntuaciones a lo largo del tiempo en individuos o grupos que han cambiado con respecto al concepto medido. | <p>13. Prueba del tamaño del efecto</p> <p>14. <b>Mínima Diferencia Clínicamente Importante</b> (MDCI): La diferencia mínima medible que es relevante para un paciente y no se debe a la varianza intrínseca del instrumento</p>                                                                                                                                                                                                                                                                                                                                                                                                                                                                                                                        | <p>Valor aceptable: &gt;0,4<sup>e</sup></p>                                                                                                                                                            |

<sup>a</sup> (Jones-caballero et al. Med Clin (Barc).2002;118(1):5–9. Lohr et al. Clin Therap 1996;18:979-992. Fayers PM et al. Wiley, Chichester (2000) p. 72–90. Smith SC et al. Health Technol Assess., 9 (2005), pp. 16-19)

<sup>b</sup> (Jones-caballero et al. Med Clin (Barc). 2002;118(1):5–9. Lohr et al. Clin Therap 1996;18:979-992. Hays et al. Qual Life Res 1993; 2:441-449)

<sup>c</sup> (Dauden et al. Health Qual Life Outcomes. 2012;10:56)

<sup>d</sup> (Both H. J Invest Dermatol. 2007;127(12):2726-39. )

<sup>e</sup> (Jones-caballero et al. Med Clin (Barc). 2002;118(1):5–9. Cohen et al. Hillsdale, NJ:Eribaum, 1988)

CVRS: Calidad de Vida Relacionada con la Salud

Tabla suplementaria 3: artículos excluidos tras la revisión del texto completo y motivo de exclusión

| Nº | Ref                                                                                                                                                                                                                                                                        | Motivo exclusión                                            |
|----|----------------------------------------------------------------------------------------------------------------------------------------------------------------------------------------------------------------------------------------------------------------------------|-------------------------------------------------------------|
| 1  | Blauvelt A et al. Secukinumab is superior to ustekinumab in clearing skin of subjects with moderate-to-severe plaque psoriasis up to 1 year: results from the CLEAR study. <i>J Am Acad Dermatol.</i> 2017; 76(1):60-69                                                    | Población española inferior al 50% de la muestra de estudio |
| 2  | Augustin M et al. Quality of life and patient benefit following transition from methotrexate to ustekinumab in psoriasis. <i>J Eur Acad Dermatol Venereol.</i> 2017; 31(2):294-303                                                                                         | Población española inferior al 50% de la muestra de estudio |
| 3  | Gual A et al. Topical treatment for scalp psoriasis: comparison of patient preference, quality of life and efficacy for non-alcoholic mometasone emulsion versus calcipotriol/betamethasone gel in daily clinical practice. <i>J Dermatolog Treat.</i> 2016; 27(3): 228-34 | Población española inferior al 50% de la muestra de estudio |
| 4  | Paul C et al. Efficacy and safety of apremilast, an oral phosphodiesterase 4 inhibitor, in patients with moderate-to-severe plaque psoriasis over 52 weeks: a phase III, randomized controlled trial (ESTEEM 2). <i>Br J Dermatol.</i> 2015; 173(6):1387-99                | Población española inferior al 50% de la muestra de estudio |
| 5  | Thaçi D et al. Secukinumab is superior to ustekinumab in clearing skin of subjects with moderate to severe plaque psoriasis: CLEAR, a randomized controlled trial. <i>J A, Acad Dermatol.</i> 2015; 73(3): 400-9                                                           | Población española inferior al 50% de la muestra de estudio |
| 6  | Karppinen TT et al. Empowering heliotherapy improves clinical outcome and quality of life of psoriasis and atopic dermatitis patients. <i>Acta Derm Venereol.</i> 2015; 95(5):579-82                                                                                       | Población española inferior al 50% de la muestra de estudio |
| 7  | Dauden E et al. Improvements in patient-reported outcomes in moderate-to-severe psoriasis patients receiving continuous or paused etanercept treatment over 54 weeks: the CRYSTEL study. <i>J Eur Acad Dermatol Venereol.</i> 2009; 23(12):1374-82                         | Población española inferior al 50% de la muestra de estudio |
| 8  | García-Sánchez L et al. Calidad de vida en el paciente con psoriasis. <i>Gac Med de Mexico.</i> 2017; 153(2):185-189                                                                                                                                                       | Población española inferior al 50% de la muestra de estudio |
| 9  | Vidal D et al. Adherence of self-administered subcutaneous methotrexate in patients with chronic plaque-type psoriasis. <i>J Eur Acad Dermatol Venereol.</i> 2016; 30(11):131-132                                                                                          | No válida o no utiliza instrumentos de PROs validados       |
| 10 | Kimball AB et al. Impact of ixekizumab on psoriasis itch severity and other psoriasis symptoms: results from 3 phase III psoriasis clinical trials. <i>J Am Acad Dermatol.</i> 2016; 75(6):1156-1161                                                                       | No válida o no utiliza instrumentos de PROs validados       |
| 11 | Obradors M et al. Health related quality of life in patients with psoriasis: a systematic review of the European literature. <i>Qual Life Res.</i> 2016; 25(11): 2739-2754                                                                                                 | No válida o no utiliza instrumentos de PROs validados       |
| 12 | Rosa S et al. Discapacidad acumulada en el transcurso vital: la cicatriz de la psoriasis en la vida del paciente. <i>Acta Dermo-sifiliogr.</i> 2014;105(2):128-134                                                                                                         | No válida o no utiliza instrumentos de PROs validados       |

PROs: Patient-Reported Outcomes o resultados percibidos por los pacientes
